# Supplementary material
Source: publisher figshare collection journal article supplement (https://karger.figshare.com/ndownloader/files/8715238)
Supplement: Supplementary file 1 [file 8715238]

## Sheet: QA
EEVRT = European Ethnoveterinary use Report closely linked to a classification according to the ATCvet code (Anatomical Therapeutic Chemical Classification System for veterinary medicinal products)
QA (Alimentary tract and metabolism)
Plant species	EEVRT	Percentage
Malva sylvestris L.	26	0.0488722
Vitis vinifera L.	17	0.0319549
Matricaria chamomilla L.	15	0.0281955
Hordeum vulgare L.	13	0.0244361
Mercurialis annua L.	12	0.0225564
Salix alba L.	12	0.0225564
Fraxinus ornus L.	11	0.0206767
Linum usitatissimum L.	11	0.0206767
Quercus ilex L	10	0.018797
Artemisia absinthium L.	9	0.0169173
Sambucus nigra L.	9	0.0169173
Apium nodiflorum (L.) Lag.	8	0.0150376
Achillea millefolium L.	7	0.0131579
Cupressus sempervirens L.	7	0.0131579
Sempervivum tectorum L.	7	0.0131579
Allium cepa L.	6	0.0112782
Laurus nobilis L.	6	0.0112782
Linum strictum L. s. l.	6	0.0112782
Lycopersicon esculentum Mill.	6	0.0112782
Olea europaea L.	6	0.0112782
Allium sativum L.	5	0.0093985
Ficus carica L.	5	0.0093985
Fraxinus excelsior L.	5	0.0093985
Oryza sativa L	5	0.0093985
Solanum nigrum L	5	0.0093985
Ulmus minor Mill.	5	0.0093985
Vicia faba L.	5	0.0093985
Avena sativa L.	4	0.0075188
Foeniculum vulgare Mill.	4	0.0075188
Galium verum L.	4	0.0075188
Geranium robertianum L.	4	0.0075188
Hypericum maculatum Crantz	4	0.0075188
Hypericum perforatum L.	4	0.0075188
Juglans regia L.	4	0.0075188
Lythrum salicaria L.	4	0.0075188
Parietaria officinalis L.	4	0.0075188
Rumex sp.	4	0.0075188
Ruta graveolens L.	4	0.0075188
Sorbus domestica L.	4	0.0075188
Triticum aestivum L.	4	0.0075188
Aesculus hippocastanum L.a	3	0.0056391
Chelidonium majus L.	3	0.0056391
Daphne gnidium L.	3	0.0056391
Euphorbia lathyris L.	3	0.0056391
Helleborus foetidus L.	3	0.0056391
Ligustrum vulgare L.	3	0.0056391
Marrubium vulgare L.	3	0.0056391
Pistacia lentiscus L.	3	0.0056391
Populus sp.	3	0.0056391
Ruta chalepensis L.	3	0.0056391
Saxifraga hirsuta L.	3	0.0056391
Saxifraga spathularis Brot.	3	0.0056391
Secale cereale L.	3	0.0056391
Trigonella foenum-graecum L.	3	0.0056391
Urtica dioica L.	3	0.0056391
Verbascum thapsus L.	3	0.0056391
Agrimonia eupatoria L.	2	< 1%
Agropyron repens (L.) Beauv	2	< 1%
Alnus glutinosa (L.) Gaertner	2	< 1%
Anemone hepatica L.	2	< 1%
Arum italicum Mill	2	< 1%
Arundo donax L.	2	< 1%
Asplenium adiantum-nigrum L.	2	< 1%
Asplenium trichomanes L.	2	< 1%
Borago officinalis L.	2	< 1%
Carpinus orientalis Miller	2	< 1%
Chamaemelum nobile (L.)	2	< 1%
Cicer arietinum L.	2	< 1%
Cirsium arvense (L.) Scop.	2	< 1%
Coffea arabica L.	2	< 1%
Cynara cardunculus L.	2	< 1%
Cynodon dactylon (L.) Pers.	2	< 1%
Digitalis thapsi L.	2	< 1%
Gentiana lutea L.	2	< 1%
Glycyrrhiza glabra L.	2	< 1%
Hedera helix L. s. l.	2	< 1%
Helichrysum italicum (Roth) G.Don	2	< 1%
Juniperus oxycedrus L.	2	< 1%
Juniperus phoenicea L.	2	< 1%
Malva sp.pl.	2	< 1%
Mentha sp.	2	< 1%
Mercurialis perennis L.	2	< 1%
Opuntia ficus-indica (L.)	2	< 1%
Papaver rhoeas L.	2	< 1%
Parietaria diffusa M. Et K.	2	< 1%
Petroselinum crispum (Mill.) A.W. Hill	2	< 1%
Phragmites australis (Cav.) Trin. ex Steud.	2	< 1%
Pimpinella anisum L.	2	< 1%
Plantago lanceolata L.	2	< 1%
Rosmarinus officinalis L.	2	< 1%
Rubia peregrina L.	2	< 1%
Rubus sp.pl.	2	< 1%
Rubus ulmifolius Schott	2	< 1%
Rumex crispus L.	2	< 1%
Salix alba L. subsp. alba	2	< 1%
Salix viminalis L.	2	< 1%
Sambucus ebulus L.	2	< 1%
Scrophularia canina L.	2	< 1%
Thymus vulgaris L.	2	< 1%
Zea mais L.	2	< 1%
Abies sp.	1	< 1%
Achillea moschata Jacq.	1	< 1%
Althaea officinalis L.	1	< 1%
Anthemis altissima L.	1	< 1%
Artemisia arborescens L.	1	< 1%
Artemisia vulgaris L.	1	< 1%
Berberis vulgaris L.	1	< 1%
Betula pendula Roth	1	< 1%
Brassica napus L.	1	< 1%
Brassica nigra (L.) Koch	1	< 1%
Bryonia dioica Jacq	1	< 1%
Buxus sempervirens L.	1	< 1%
Calendula arvensis L.	1	< 1%
Calendula officinalis L.	1	< 1%
Calendula sp.pl.	1	< 1%
Carlina utzka Hacq	1	< 1%
Carum carvi L.	1	< 1%
Ceratonia siliqua L.	1	< 1%
Ceterach officinarum DC. In Lam. et DC.	1	< 1%
Chaerophyllum aureum L.	1	< 1%
Cirsium eriophorum (L.) Scop.	1	< 1%
Clematis vitalba L.	1	< 1%
Convolvulus arvensis L.	1	< 1%
Cornus mas L.	1	< 1%
Cotinus coggyria Scop.	1	< 1%
Crataegus laevigata L.	1	< 1%
Cuminum cyminum L.	1	< 1%
Cynara scolimus L.	1	< 1%
Cytisus scoparius (L.)	1	< 1%
Daucus carota L. s. l.	1	< 1%
Digitalis obscura L.	1	< 1%
Dracunculus vulgaris Schott	1	< 1%
Ecballium elaterium (L.) A. Rich.	1	< 1%
Equisetum arvense L.	1	< 1%
Equisetum telmateia Ehrh.	1	< 1%
Euonymus europaeus L.	1	< 1%
Euphorbia spinosa L.	1	< 1%
Fraxinus angustifolia Vah	1	< 1%
Fraxinus oxycarpa Bieb.	1	< 1%
Fumaria officinalis L.	1	< 1%
Galium aparine L.	1	< 1%
Gentiana acaulis L.	1	< 1%
Gentiana punctata L.	1	< 1%
Gentiana purpurea L.	1	< 1%
Geranium rotundifolium L.	1	< 1%
Geum urbanum L.	1	< 1%
Helleborus odorus W.K.	1	< 1%
Helleborus orientalis Lam.	1	< 1%
Helleborus sp.	1	< 1%
Humulus lupulus L.	1	< 1%
Hyssopus officinalis L.	1	< 1%
Jasonia tuberosa (L.) DC.	1	< 1%
Juniperus communis L.	1	< 1%
Larix decidua Miller	1	< 1%
Lavatera cretica L.	1	< 1%
Lavatera olbia L.	1	< 1%
Lilium martagon L.	1	< 1%
Lotus corniculatus L.	1	< 1%
Lysimachia ephemerum L.	1	< 1%
Malva neglecta Wallr.	1	< 1%
Medicago minima (L.) L.	1	< 1%
Mentha pulegium L.	1	< 1%
Mentha suaveolens Ehrh	1	< 1%
Myrtus communis L.	1	< 1%
Nasturtium officinale R.Br.	1	< 1%
Oenanthe pimpinelloides	1	< 1%
Opuntia maxima Mill.	1	< 1%
Peucedanum ostruthium (L.) Koch	1	< 1%
Phlomis pungens Willd. var. Hirta Velen	1	< 1%
Plantago major L. s. l.	1	< 1%
Plantago sp.pl.	1	< 1%
Potentilla reptans L.	1	< 1%
Prunus avium L.	1	< 1%
Prunus domestica L.	1	< 1%
Prunus spinosa L.	1	< 1%
Pyracantha coccinea M. Roem.	1	< 1%
Quercus pubescens Willd.	1	< 1%
Quercus sp.	1	< 1%
Quercus x cerrioides Willk. Et Costa	1	< 1%
Rorippa nasturtium-aquaticum (L.)	1	< 1%
Rubus fruticosus L.	1	< 1%
Rumex acetosella L.	1	< 1%
Rumex alpinus L.	1	< 1%
Rumex obtusifolius L.	1	< 1%
Ruscus aculeatus L.	1	< 1%
Salix sp.	1	< 1%
Santolina chamaecyparissus L.	1	< 1%
Santolina marchii Arrigoni	1	< 1%
Satureja montana L	1	< 1%
Scirpoides holoschoenus (L.) Sojak	1	< 1%
Smyrnium olusatrum L.	1	< 1%
Sonchus asper L.	1	< 1%
Sorbus sp.pl.	1	< 1%
Spartium junceum L.	1	< 1%
Symphytum officinale L.	1	< 1%
Tanacetum vulgare L.	1	< 1%
Telephium imperati L.	1	< 1%
Teucrium chamaedrys L.	1	< 1%
Thalictrum aquilegifolium L.	1	< 1%
Thapsia villosa L.	1	< 1%
Thymus pulegioides L.	1	< 1%
Triticum durum Desf.	1	< 1%
Umbilicus rupestris (Salisb.) Dandy	1	< 1%
Urtica membranaceae Poiret	1	< 1%
Vigna unguiculata (L.) Walp	1	< 1%
Total	532	1

## Sheet: QA subcodes
EEVRT = European Ethnoveterinary use Report closely linked to a classification according to the ATCvet code (Anatomical Therapeutic Chemical Classification System for veterinary medicinal products)
QA03 (DRUGS FOR FUNCTIONAL GASTROINTESTINAL DISORDERS)				QA07 (ANTIDIARRHEALS, INTESTINAL ANTI-INFLAMMATORY/ANTIINFECTIVE AGENTS)
Plant species	EEVRT	Percentage		Plant species	EEVRT	Percentage
Malva sylvestris L.	11	0.0982143		Quercus ilex L	8	0.0879121
Salix alba L.	11	0.0982143		Malva sylvestris L.	5	0.0549451
Matricaria chamomilla L.	8	0.0714286		Sambucus nigra L.	5	0.0549451
Cupressus sempervirens L.	4	0.0357143		Fraxinus ornus L.	4	0.043956
Laurus nobilis L.	4	0.0357143		Hordeum vulgare L.	4	0.043956
Allium cepa L.	3	0.0267857		Oryza sativa L	4	0.043956
Artemisia absinthium L.	3	0.0267857		Achillea millefolium L.	3	0.032967
Avena sativa L.	3	0.0267857		Daphne gnidium L.	3	0.032967
Hypericum perforatum L.	3	0.0267857		Geranium robertianum L.	3	0.032967
Linum usitatissimum L.	3	0.0267857		Sorbus domestica L.	3	0.032967
Olea europaea L.	3	0.0267857		Alnus glutinosa (L.) Gaertner	2	0.021978
Sempervivum tectorum L.	3	0.0267857		Artemisia absinthium L.	2	0.021978
Vitis vinifera L.	3	0.0267857		Carpinus orientalis Miller	2	0.021978
Chamaemelum nobile (L.)	2	0.0178571		Galium verum L.	2	0.021978
Ficus carica L.	2	0.0178571		Hypericum maculatum Crantz	2	0.021978
Helleborus foetidus L.	2	0.0178571		Lythrum salicaria L.	2	0.021978
Hypericum maculatum Crantz	2	0.0178571		Parietaria officinalis L.	2	0.021978
Juglans regia L.	2	0.0178571		Rubus ulmifolius Schott	2	0.021978
Linum strictum L. s. l.	2	0.0178571		Rumex sp.	2	0.021978
Marrubium vulgare L.	2	0.0178571		Vicia faba L.	2	0.021978
Rubia peregrina L.	2	0.0178571		Aesculus hippocastanum L.a	1	0.010989
Ruta chalepensis L.	2	0.0178571		Agrimonia eupatoria L.	1	0.010989
Sambucus nigra L.	2	0.0178571		Allium cepa L.	1	0.010989
Trigonella foenum-graecum L.	2	0.0178571		Avena sativa L.	1	0.010989
Triticum aestivum L.	2	0.0178571		Ceratonia siliqua L.	1	0.010989
Chaerophyllum aureum L.	1	0.00892857		Chelidonium majus L.	1	0.010989
Chelidonium majus L.	1	0.00892857		Cornus mas L.	1	0.010989
Cytisus scoparius (L.)	1	0.00892857		Cupressus sempervirens L.	1	0.010989
Dracunculus vulgaris Schott	1	0.00892857		Daucus carota L. s. l.	1	0.010989
Foeniculum vulgare Mill.	1	0.00892857		Helleborus orientalis Lam.	1	0.010989
Fraxinus excelsior L.	1	0.00892857		Helleborus sp.	1	0.010989
Fraxinus ornus L.	1	0.00892857		Lavatera olbia L.	1	0.010989
Galium aparine L.	1	0.00892857		Linum usitatissimum L.	1	0.010989
Helichrysum italicum (Roth) G.Don	1	0.00892857		Mentha pulegium L.	1	0.010989
Jasonia tuberosa (L.) DC.	1	0.00892857		Mentha suaveolens Ehrh	1	0.010989
Lycopersicon esculentum Mill.	1	0.00892857		Opuntia ficus-indica (L.)	1	0.010989
Lythrum salicaria L.	1	0.00892857		Opuntia maxima Mill.	1	0.010989
Medicago minima (L.) L.	1	0.00892857		Parietaria diffusa M. Et K.	1	0.010989
Petroselinum crispum (Mill.) A.W. Hill	1	0.00892857		Phlomis pungens Willd. var. Hirta Velen	1	0.010989
Pistacia lentiscus L.	1	0.00892857		Phragmites australis (Cav.) Trin. ex Steud.	1	0.010989
Potentilla reptans L.	1	0.00892857		Plantago lanceolata L.	1	0.010989
Rosmarinus officinalis L.	1	0.00892857		Prunus spinosa L.	1	0.010989
Ruta graveolens L.	1	0.00892857		Pyracantha coccinea M. Roem.	1	0.010989
Salix viminalis L.	1	0.00892857		Quercus x cerrioides Willk. Et Costa	1	0.010989
Santolina chamaecyparissus L.	1	0.00892857		Rubus sp.pl.	1	0.010989
Satureja montana L	1	0.00892857		Rumex acetosella L.	1	0.010989
Scrophularia canina L.	1	0.00892857		Rumex crispus L.	1	0.010989
Spartium junceum L.	1	0.00892857		Thymus vulgaris L.	1	0.010989
Tanacetum vulgare L.	1	0.00892857		Umbilicus rupestris (Salisb.) Dandy	1	0.010989
Thapsia villosa L.	1	0.00892857		Total	91	1
Urtica dioica L.	1	0.00892857
Total	112	1

## Sheet: QC
EEVRT = European Ethnoveterinary use Report closely linked to a classification according to the ATCvet code (Anatomical Therapeutic Chemical Classification System for veterinary medicinal products)
QC (Cardiovascolar system)
Plant species	EEVRT	Percentage
Arctostaphylos uva-ursi (L.)	6	0.214286
Bryonia aspera Steven ex. Ledeb.	2	0.0714286
Equisetum arvense L.	2	0.0714286
Equisetum ramosissimum Desf	2	0.0714286
Equisetum telmateia Ehrh.	2	0.0714286
Simethis mattiazzi L.	2	0.0714286
Zea mais L.	2	0.0714286
Achillea millefolium L.	1	0.0357143
Achillea nobilis L.	1	0.0357143
Artemisa abrotanum L.	1	0.0357143
Arundo donax L.	1	0.0357143
Helleborus orientalis Lam.	1	0.0357143
Malva neglecta Wallr.	1	0.0357143
Saxifraga hirsuta L.	1	0.0357143
Scirpoides holoschoenus (L.) Sojak	1	0.0357143
Smilax aspera L.	1	0.0357143
Viscum album L.	1	0.0357143
Total	28	1

## Sheet: QD
EEVRT = European Ethnoveterinary use Report closely linked to a classification according to the ATCvet code (Anatomical Therapeutic Chemical Classification System for veterinary medicinal products)
QD (Dermatologicals)
Plant species	EEVRT	Percentage
Scrophularia canina L.	19	0.0431818
Malva sylvestris L.	16	0.0363636
Hypericum perforatum L.	14	0.0318182
Plantago major L. s. l.	14	0.0318182
Pinus halepensis Miller	9	0.0204545
Parietaria officinalis L.	8	0.0181818
Quercus pubescens Willd.	8	0.0181818
Sambucus nigra L.	8	0.0181818
Lupinus albus L.	7	0.0159091
Vitis vinifera L.	7	0.0159091
Olea europaea L.	6	0.0136364
Quercus sp.	6	0.0136364
Triticum aestivum L.	6	0.0136364
Umbilicus rupestris (Salisb.) Dandy	6	0.0136364
Allium sativum L.	5	0.0113636
Ecballium elaterium (L.) A. Rich.	5	0.0113636
Equisetum telmateia Ehrh.	5	0.0113636
Marrubium vulgare L.	5	0.0113636
Stachys officinalis (L.) Trev.	5	0.0113636
Ulmus minor Mill.	5	0.0113636
Agropyron repens (L.) Beauv	4	0.00909091
Chelidonium majus L.	4	0.00909091
Helleborus foetidus L.	4	0.00909091
Juniperus oxycedrus L.	4	0.00909091
Nerium oleander L.	4	0.00909091
Nicotiana tabacum L.	4	0.00909091
Paeonia broteroi Boiss. & Reut.	4	0.00909091
Quercus cerris L.	4	0.00909091
Teucrium chamaedrys L.	4	0.00909091
Verbascum thapsus L.	4	0.00909091
Verbena officinalis L.	4	0.00909091
Achillea millefolium L.	3	0.00681818
Agave americana L.	3	0.00681818
Calendula officinalis L.	3	0.00681818
Cistus creticus L.	3	0.00681818
Clematis campaniflora Brot.	3	0.00681818
Conium maculatum L.	3	0.00681818
Cynoglossum officinale L.	3	0.00681818
Cytisus scoparius (L.)	3	0.00681818
Erigeron acer Bivona	3	0.00681818
Hedera helix L. s. l.	3	0.00681818
Helleborus odorus W.K.	3	0.00681818
Juglans regia L.	3	0.00681818
Plantago lanceolata L.	3	0.00681818
Smilax aspera L.	3	0.00681818
Sonchus oleraceus L.	3	0.00681818
Urginea maritima (L.) Baker	3	0.00681818
Valeriana officinalis L.	3	0.00681818
Veratrum album L.	3	0.00681818
Verbascum sinuatum L.	3	0.00681818
Althaea officinalis L.	2	< 1%
Anagallis arvensis L.	2	< 1%
Brassica oleracea L.	2	< 1%
Bryonia dioica Jacq	2	< 1%
Centaurea ornata Willd.	2	< 1%
Cistus ladanifer L.	2	< 1%
Cotinus coggyria Scop.	2	< 1%
Cynoglossum creticum Miller	2	< 1%
Echium vulgare L.	2	< 1%
Ilex aquifolium L	2	< 1%
Inula viscosa (L.) Aiton	2	< 1%
Kichxia elatine (L.) Dumort.	2	< 1%
Linum usitatissimum L.	2	< 1%
Malva neglecta Wallr.	2	< 1%
Matricaria chamomilla L.	2	< 1%
Morus nigra L.	2	< 1%
Parietaria diffusa M. Et K.	2	< 1%
Petroselinum crispum (Mill.) A.W. Hill	2	< 1%
Pistacia lentiscus L.	2	< 1%
Quercus suber L.	2	< 1%
Rhamnus alpinus L.	2	< 1%
Rhamnus catharticus L.	2	< 1%
Rosmarinus officinalis L.	2	< 1%
Ruta graveolens L.	2	< 1%
Ruta montana (L.) L.	2	< 1%
Sambucus ebulus L.	2	< 1%
Secale cereale L.	2	< 1%
Sedum sp.pl.	2	< 1%
Senecio jacobaea L.	2	< 1%
Sideritis hirsuta L.	2	< 1%
Stachys germanica L.	2	< 1%
Symphytum officinale L.	2	< 1%
Urtica dioica L.	2	< 1%
Veratrum nigrum L.	2	< 1%
Zea mais L.	2	< 1%
Abies alba Mill.	1	< 1%
Acer neapolitanum Ten.	1	< 1%
Achillea nobilis L.	1	< 1%
Agrimonia eupatoria L.	1	< 1%
Alkanna tinctoria (L.) Tausch	1	< 1%
Alliaria petiolata (Bieb.)	1	< 1%
Allium cepa L.	1	< 1%
Allium vineale Lam.	1	< 1%
Anemone hortensis L.	1	< 1%
Angelica sylvestris L.	1	< 1%
Arctium minus (Hill) Bernh. ssp.pubens	1	< 1%
Aristolochia maurorum L.	1	< 1%
Artemisia absinthium L.	1	< 1%
Arum italicum Mill	1	< 1%
Asphodelus microcarpus Salzm.& Viv	1	< 1%
Avena sativa L.	1	< 1%
Borago officinalis L.	1	< 1%
Brassica napus L.	1	< 1%
Brassica nigra (L.) Koch	1	< 1%
Bupleurum gibraltaricum Lam.	1	< 1%
Buxus sempervirens L.	1	< 1%
Calamintha nepeta (L.)	1	< 1%
Cardopatium corymbosum (L.) Pers.	1	< 1%
Chrozophora tinctoria (L.) Juss.	1	< 1%
Cirsium arvense (L.) Scop.	1	< 1%
Cistus laurifolius L.	1	< 1%
Cistus monspeliensis L.	1	< 1%
Coffea arabica L.	1	< 1%
Cupressus sempervirens L.	1	< 1%
Cyclamen hederifolium Aiton	1	< 1%
Daphne gnidium L.	1	< 1%
Digitalis obscura L.	1	< 1%
Dittrichia viscosa (L.)	1	< 1%
Doronicum orientale Hoffm.	1	< 1%
Dorycnium rectum (L.) Ser.	1	< 1%
Eryngium bourgattii Gouan	1	< 1%
Eupatorium cannabinum L	1	< 1%
Euphorbia ceratocarpa Ten.	1	< 1%
Euphorbia characias L.	1	< 1%
Euphorbia helioscopia L.	1	< 1%
Euphorbia rigida Bieb.	1	< 1%
Foeniculum vulgare Mill.	1	< 1%
Fraxinus ornus L.	1	< 1%
Gentiana lutea L.	1	< 1%
Geum urbanum L.	1	< 1%
Hedera sp.	1	< 1%
Heliotropium europaeum L.	1	< 1%
Helleborus orientalis Lam.	1	< 1%
Helleborus purpurascens W. et K.	1	< 1%
Helleborus viridis L.	1	< 1%
Hyoscyamus albus L.	1	< 1%
Laburnum anagyroides Med.	1	< 1%
Larix decidua Miller	1	< 1%
Lavandula angustifolia Mill.	1	< 1%
Lens culinaris Medik.	1	< 1%
Lycoperdon sp.	1	< 1%
Malus sylvestris MILL.	1	< 1%
Malva moschata L.	1	< 1%
Malva parvifolia L.	1	< 1%
Marrubium incanum Desr.	1	< 1%
Mentha longifolia (L.) Huds.	1	< 1%
Mentha x piperita L.	1	< 1%
Micromeria graeca (L.) Benth.	1	< 1%
Myrtus communis L.	1	< 1%
Nasturtium officinale R.Br.	1	< 1%
Opuntia ficus-indica (L.)	1	< 1%
Pallenis spinosa (L.) Cass.	1	< 1%
Panicum miliaceum L	1	< 1%
Papaver rhoeas L.	1	< 1%
Phlomis purpurea L.	1	< 1%
Phytolacca americana L.	1	< 1%
Picea abies (L.) H. Karst.	1	< 1%
Plantago sp.pl.	1	< 1%
Plumbago europaea L.	1	< 1%
Polygonum aviculare L.	1	< 1%
Prunus divaricata Ledeb.	1	< 1%
Prunus domestica L.	1	< 1%
Prunus spinosa L.	1	< 1%
Pteridium aquilinum (L.)	1	< 1%
Quercus robur L.	1	< 1%
Ranunculus bulbosus L.	1	< 1%
Ranunculus ficaria L.	1	< 1%
Raphanus raphanistrum L.	1	< 1%
Rhamnus saxatilis Jacq.	1	< 1%
Ricinus communis L.	1	< 1%
Rubus fruticosus L.	1	< 1%
Rubus ulmifolius Schott	1	< 1%
Rumex crispus L.	1	< 1%
Rumex obtusifolius L.	1	< 1%
Ruta angustifolia Pers.	1	< 1%
Ruta chalepensis L.	1	< 1%
Salix alba L. subsp. alba	1	< 1%
Salvia verbenaca L.	1	< 1%
Sambucus sp.	1	< 1%
Satureja montana L	1	< 1%
Solanum melongena L.	1	< 1%
Tamus communis L.	1	< 1%
Teucrium montanum L.	1	< 1%
Thymus mastichina (L.) L.	1	< 1%
Tuberaria lignosa	1	< 1%
Urospermum picroides (L.) Scop. ex F.W. Schmid	1	< 1%
Urtica urens L.	1	< 1%
Verbascum densiflorum Bert.	1	< 1%
Verbascum mallophorum L.	1	< 1%
Verbascum sp.pl.	1	< 1%
Total	440	1

## Sheet: QD subcodes
EEVRT = European Ethnoveterinary use Report closely linked to a classification according to the ATCvet code (Anatomical Therapeutic Chemical Classification System for veterinary medicinal products)
QD01 (ANTIFUNGALS FOR DERMATOLOGICAL USE)				QD03 (PREPARATIONS FOR TREATMENT OF WOUNDS AND ULCERS)				QD51 (PRODUCTS FOR THE TREATMENT OF CLAWS AND HOOFS)
Plant species	EEVRT	Percentage		Plant species	EEVRT	Percentage		Plant species	EEVRT	Percentage
Nerium oleander L.	3	0.214286		Malva sylvestris L.	11	0.0569948		Pinus halepensis Miller	4	0.125
Nicotiana tabacum L.	2	0.142857		Hypericum perforatum L.	10	0.0518135		Scrophularia canina L.	4	0.125
Conium maculatum L.	1	0.0714286		Plantago major L. s. l.	9	0.0466321		Teucrium chamaedrys L.	4	0.125
Heliotropium europaeum L.	1	0.0714286		Scrophularia canina L.	9	0.0466321		Allium sativum L.	3	0.09375
Helleborus orientalis Lam.	1	0.0714286		Umbilicus rupestris (Salisb.) Dandy	6	0.0310881		Erigeron acer Bivona	3	0.09375
Lupinus albus L.	1	0.0714286		Pinus halepensis Miller	5	0.0259067		Cistus creticus L.	2	0.0625
Olea europaea L.	1	0.0714286		Ecballium elaterium (L.) A. Rich.	4	0.0207254		Nicotiana tabacum L.	2	0.0625
Pistacia lentiscus L.	1	0.0714286		Equisetum telmateia Ehrh.	4	0.0207254		Arum italicum Mill	1	0.03125
Raphanus raphanistrum L.	1	0.0714286		Sambucus nigra L.	4	0.0207254		Larix decidua Miller	1	0.03125
Rhamnus catharticus L.	1	0.0714286		Stachys officinalis (L.) Trev.	4	0.0207254		Panicum miliaceum L	1	0.03125
Sambucus nigra L.	1	0.0714286		Ulmus minor Mill.	4	0.0207254		Plantago lanceolata L.	1	0.03125
Total	14	1		Calendula officinalis L.	3	0.015544		Plantago major L. s. l.	1	0.03125
				Clematis campaniflora Brot.	3	0.015544		Prunus divaricata Ledeb.	1	0.03125
				Olea europaea L.	3	0.015544		Teucrium montanum L.	1	0.03125
				Quercus pubescens Willd.	3	0.015544		Veratrum album L.	1	0.03125
				Quercus sp.	3	0.015544		Verbascum thapsus L.	1	0.03125
				Triticum aestivum L.	3	0.015544		Vitis vinifera L.	1	0.03125
				Verbena officinalis L.	3	0.015544		Total	32	1
				Vitis vinifera L.	3	0.015544
				Achillea millefolium L.	2	0.0103627
				Bryonia dioica Jacq	2	0.0103627
				Centaurea ornata Willd.	2	0.0103627
				Chelidonium majus L.	2	0.0103627
				Cistus ladanifer L.	2	0.0103627
				Cotinus coggyria Scop.	2	0.0103627
				Cytisus scoparius (L.)	2	0.0103627
				Helleborus odorus W.K.	2	0.0103627
				Juniperus oxycedrus L.	2	0.0103627
				Lupinus albus L.	2	0.0103627
				Malva neglecta Wallr.	2	0.0103627
				Matricaria chamomilla L.	2	0.0103627
				Paeonia broteroi Boiss. & Reut.	2	0.0103627
				Parietaria officinalis L.	2	0.0103627
				Petroselinum crispum (Mill.) A.W. Hill	2	0.0103627
				Rosmarinus officinalis L.	2	0.0103627
				Ruta montana (L.) L.	2	0.0103627
				Secale cereale L.	2	0.0103627
				Senecio jacobaea L.	2	0.0103627
				Symphytum officinale L.	2	0.0103627
				Valeriana officinalis L.	2	0.0103627
				Veratrum nigrum L.	2	0.0103627
				Abies alba Mill.	1	0.00518135
				Acer neapolitanum Ten.	1	0.00518135
				Achillea nobilis L.	1	0.00518135
				Agave americana L.	1	0.00518135
				Alkanna tinctoria (L.) Tausch	1	0.00518135
				Anagallis arvensis L.	1	0.00518135
				Arctium minus (Hill) Bernh. ssp.pubens	1	0.00518135
				Aristolochia maurorum L.	1	0.00518135
				Bupleurum gibraltaricum Lam.	1	0.00518135
				Calamintha nepeta (L.)	1	0.00518135
				Cardopatium corymbosum (L.) Pers.	1	0.00518135
				Cistus creticus L.	1	0.00518135
				Cistus laurifolius L.	1	0.00518135
				Cynoglossum creticum Miller	1	0.00518135
				Cynoglossum officinale L.	1	0.00518135
				Digitalis obscura L.	1	0.00518135
				Dittrichia viscosa (L.)	1	0.00518135
				Doronicum orientale Hoffm.	1	0.00518135
				Dorycnium rectum (L.) Ser.	1	0.00518135
				Foeniculum vulgare Mill.	1	0.00518135
				Gentiana lutea L.	1	0.00518135
				Helleborus foetidus L.	1	0.00518135
				Hyoscyamus albus L.	1	0.00518135
				Juglans regia L.	1	0.00518135
				Lavandula angustifolia Mill.	1	0.00518135
				Linum usitatissimum L.	1	0.00518135
				Malus sylvestris MILL.	1	0.00518135
				Malva moschata L.	1	0.00518135
				Marrubium vulgare L.	1	0.00518135
				Mentha longifolia (L.) Huds.	1	0.00518135
				Nicotiana glauca R. C. Graham	1	0.00518135
				Pallenis spinosa (L.) Cass.	1	0.00518135
				Phlomis purpurea L.	1	0.00518135
				Picea abies (L.) H. Karst.	1	0.00518135
				Pistacia lentiscus L.	1	0.00518135
				Plantago lanceolata L.	1	0.00518135
				Plumbago europaea L.	1	0.00518135
				Prunus domestica L.	1	0.00518135
				Prunus spinosa L.	1	0.00518135
				Pteridium aquilinum (L.)	1	0.00518135
				Quercus cerris L.	1	0.00518135
				Quercus suber L.	1	0.00518135
				Rubus ulmifolius Schott	1	0.00518135
				Ruta angustifolia Pers.	1	0.00518135
				Ruta chalepensis L.	1	0.00518135
				Ruta graveolens L.	1	0.00518135
				Sambucus ebulus L.	1	0.00518135
				Sideritis hirsuta L.	1	0.00518135
				Smilax aspera L.	1	0.00518135
				Thymus mastichina (L.) L.	1	0.00518135
				Tuberaria lignosa	1	0.00518135
				Urginea maritima (L.) Baker	1	0.00518135
				Urtica dioica L.	1	0.00518135
				Verbascum thapsus L.	1	0.00518135
				Zea mais L.	1	0.00518135
				Total	193	1

## Sheet: QG
EEVRT = European Ethnoveterinary use Report closely linked to a classification according to the ATCvet code (Anatomical Therapeutic Chemical Classification System for veterinary medicinal products)
QG (Genito urinary system and sex hormon)
Plant species	EEVRT	Percentage
Malva sylvestris L.	21	0.0679612
Vitis vinifera L.	14	0.0453074
Urtica dioica L.	11	0.0355987
Parietaria diffusa M. Et K.	10	0.0323625
Hedera helix L. s. l.	8	0.02589
Matricaria chamomilla L.	8	0.02589
Mercurialis annua L.	7	0.0226537
Avena sativa L.	6	0.0194175
Triticum aestivum L.	6	0.0194175
Foeniculum vulgare Mill.	5	0.0161812
Hypericum perforatum L.	5	0.0161812
Ceterach officinarum DC. In Lam. et DC.	4	0.012945
Galega officinalis L.	4	0.012945
Helleborus viridis L.	4	0.012945
Lycopersicon esculentum Mill.	4	0.012945
Picris echioides L.	4	0.012945
Potentilla reptans L.	4	0.012945
Rubia peregrina L.	4	0.012945
Adiantum capillus-veneris L.	3	0.00970874
Allium cepa L.	3	0.00970874
Capsella bursa-pastoris (L.) Medik.	3	0.00970874
Helleborus orientalis Lam.	3	0.00970874
Heracleum sphondylium L.	3	0.00970874
Juniperus oxycedrus L.	3	0.00970874
Laurus nobilis L.	3	0.00970874
Linum usitatissimum L.	3	0.00970874
Malva neglecta Wallr.	3	0.00970874
Medicago sativa L.	3	0.00970874
Sambucus nigra L.	3	0.00970874
Scrophularia canina L.	3	0.00970874
Achillea collina J. Becker ex Reichenb.	2	0.00647249
Brassica napus L.	2	0.00647249
Bryonia dioica Jacq	2	0.00647249
Calamintha nepeta (L.)	2	0.00647249
Carduus pycnocephalus L.	2	0.00647249
Cistus laurifolius L.	2	0.00647249
Fraxinus ornus L.	2	0.00647249
Juglans regia L.	2	0.00647249
Juniperus communis L.	2	0.00647249
Olea europaea L.	2	0.00647249
Oryza sativa L	2	0.00647249
Parietaria officinalis L.	2	0.00647249
Plantago lanceolata L.	2	0.00647249
Prunus avium L.	2	0.00647249
Quercus ilex L	2	0.00647249
Retama sphaerocarpa (L.) Boiss.	2	0.00647249
Ruta montana (L.) L.	2	0.00647249
Sanguisorba minor L.	2	0.00647249
Secale cereale L.	2	0.00647249
Sedum rupestre L.	2	0.00647249
Solanum tuberosum L.	2	0.00647249
Urtica sp.pl.	2	0.00647249
Viscum album L.	2	0.00647249
Zea mais L.	2	0.00647249
Alchemilla alpina L.	1	< 1%
Alchemilla sp.	1	< 1%
Alchemilla vulgaris L.	1	< 1%
Allium sativum L.	1	< 1%
Angelica sylvestris L.	1	< 1%
Arctostaphylos uva-ursi (L.)	1	< 1%
Artemisia vulgaris L.	1	< 1%
Arundo donax L.	1	< 1%
Asphodelus aestivus Brot.	1	< 1%
Asplenium trichomanes L.	1	< 1%
Borago officinalis L.	1	< 1%
Brassica oleracea L.	1	< 1%
Buxus sempervirens L.	1	< 1%
Calluna vulgaris (L.) Hull	1	< 1%
Capsicum annuum L.	1	< 1%
Cardopatium corymbosum (L.) Pers.	1	< 1%
Chelidonium majus L.	1	< 1%
Cicer arietinum L.	1	< 1%
Cinnamomum verum J.Presl	1	< 1%
Cistus albidus L.	1	< 1%
Coffea arabica L.	1	< 1%
Crithmum maritimum L.	1	< 1%
Crocus sativus L.	1	< 1%
Cyclamen repandum Sibth. Et Sm.	1	< 1%
Cynodon dactylon (L.) Pers.	1	< 1%
Daphne gnidium L.	1	< 1%
Diplotaxis erucoides (L.) DC.	1	< 1%
Equisetum arvense L.	1	< 1%
Equisetum hyemale L.	1	< 1%
Euphorbia amygdaloides (L.)	1	< 1%
Euphorbia glareosa Pall. Ex Bieb.	1	< 1%
Ficus carica L.	1	< 1%
Helleborus foetidus L.	1	< 1%
Helleborus niger L.	1	< 1%
Hordeum vulgare L.	1	< 1%
Hyssopus officinalis L.	1	< 1%
Juniperus sabina L.	1	< 1%
Lactarius zonarius (Bull) Fr.	1	< 1%
Lavandula latifolia Medik.	1	< 1%
Leontodon tuberosus L.	1	< 1%
Marrubium vulgare L.	1	< 1%
Melissa officinalis L.	1	< 1%
Melitotus sp.pl	1	< 1%
Mentha pulegium L.	1	< 1%
Merendera montana (L.)	1	< 1%
Nasturtium officinale R.Br.	1	< 1%
Nicotiana glauca R. C. Graham	1	< 1%
Onobrychis viciifolia Scop.	1	< 1%
Ononis spinosa L.	1	< 1%
Paeonia broteroi Boiss. & Reut.	1	< 1%
Paliurus spina-christi Mill.	1	< 1%
Papaver rhoeas L.	1	< 1%
Parietaria sp.pl.	1	< 1%
Petroselinum crispum (Mill.) A.W. Hill	1	< 1%
Phaseolus vulgaris L.	1	< 1%
Phlomis lychnitis L.	1	< 1%
Phlomis purpurea L.	1	< 1%
Plantago coronopus L.	1	< 1%
Polygonum persicaria L.	1	< 1%
Prunus cerasus L.	1	< 1%
Pteridium aquilinum (L.)	1	< 1%
Quercus rotundifolia Lam.	1	< 1%
Ranunculus bulbosus L.	1	< 1%
Raphanus raphanistrum L.	1	< 1%
Rosa canina L.	1	< 1%
Rosmarinus officinalis L.	1	< 1%
Rubia tinctorum L.	1	< 1%
Rubus ulmifolius Schott	1	< 1%
Ruscus hypoglossum L.	1	< 1%
Ruta angustifolia Pers.	1	< 1%
Ruta graveolens L.	1	< 1%
Salvia officinalis L.	1	< 1%
Salvia sclarea L.	1	< 1%
Sambucus ebulus L.	1	< 1%
Saxifraga paniculata vill.	1	< 1%
Scorpiurus subvillosus L.	1	< 1%
Scrophularia nodosa L.	1	< 1%
Senecio jacobaea L.	1	< 1%
Sideritis hirsuta L.	1	< 1%
Smilax aspera L.	1	< 1%
Sonchus oleraceus L.	1	< 1%
Stellaria media (L.) Vill.	1	< 1%
Stipa tenacissima L.	1	< 1%
Symphytum officinale L.	1	< 1%
Tanacetum parthenium (L.)	1	< 1%
Tanacetum vulgare L.	1	< 1%
Teucrium chamaedrys L.	1	< 1%
Thuja occidentalis L.	1	< 1%
Thymus serpyllum L.	1	< 1%
Thymus vulgaris L.	1	< 1%
Ulmus minor Mill.	1	< 1%
Umbilicus rupestris (Salisb.) Dandy	1	< 1%
Urtica membranaceae Poiret	1	< 1%
Urtica urens L.	1	< 1%
Veratrum album L.	1	< 1%
Verbena officinalis L.	1	< 1%
Total	309	1

## Sheet: QG subcodes
EEVRT = European Ethnoveterinary use Report closely linked to a classification according to the ATCvet code (Anatomical Therapeutic Chemical Classification System for veterinary medicinal products)
QG01 (GYNECOLOGICAL ANTIINFECTIVES AND ANTISEPTICS)				QG02 (OTHER GYNECOLOGICALS)				QG52 (PRODUCTS FOR TEATS AND UDDER)
Plant species	EEVRT	Percentage		Plant species	EEVRT	Percentage		Plant species	EEVRT	Percentage
Malva sylvestris L.	10	0.263158		Mercurialis annua L.	5	0.0757576		Vitis vinifera L.	7	0.106061
Parietaria diffusa M. Et K.	6	0.157895		Vitis vinifera L.	5	0.0757576		Malva sylvestris L.	4	0.0606061
Foeniculum vulgare Mill.	2	0.0526316		Matricaria chamomilla L.	4	0.0606061		Hypericum perforatum L.	3	0.0454546
Oryza sativa L	2	0.0526316		Lycopersicon esculentum Mill.	3	0.0454546		Medicago sativa L.	3	0.0454546
Triticum aestivum L.	2	0.0526316		Malva sylvestris L.	3	0.0454546		Urtica dioica L.	3	0.0454546
Arundo donax L.	1	0.0263158		Rubia peregrina L.	3	0.0454546		Achillea collina J. Becker ex Reichenb.	2	0.030303
Cistus laurifolius L.	1	0.0263158		Adiantum capillus-veneris L.	2	0.030303		Avena sativa L.	2	0.030303
Crocus sativus L.	1	0.0263158		Ceterach officinarum DC. In Lam. et DC.	2	0.030303		Calamintha nepeta (L.)	2	0.030303
Hedera helix L. s. l.	1	0.0263158		Laurus nobilis L.	2	0.030303		Galega officinalis L.	2	0.030303
Lavandula latifolia Medik.	1	0.0263158		Quercus ilex L	2	0.030303		Helleborus orientalis Lam.	2	0.030303
Marrubium vulgare L.	1	0.0263158		Retama sphaerocarpa (L.) Boiss.	2	0.030303		Heracleum sphondylium L.	2	0.030303
Mentha pulegium L.	1	0.0263158		Ruta montana (L.) L.	2	0.030303		Matricaria chamomilla L.	2	0.030303
Plantago lanceolata L.	1	0.0263158		Sedum rupestre L.	2	0.030303		Olea europaea L.	2	0.030303
Polygonum persicaria L.	1	0.0263158		Allium cepa L.	1	0.0151515		Sambucus nigra L.	2	0.030303
Salvia officinalis L.	1	0.0263158		Artemisia vulgaris L.	1	0.0151515		Alchemilla alpina L.	1	0.0151515
Sambucus ebulus L.	1	0.0263158		Asplenium trichomanes L.	1	0.0151515		Alchemilla vulgaris L.	1	0.0151515
Saxifraga paniculata vill.	1	0.0263158		Bryonia dioica Jacq	1	0.0151515		Asphodelus aestivus Brot.	1	0.0151515
Smilax aspera L.	1	0.0263158		Capsella bursa-pastoris (L.) Medik.	1	0.0151515		Borago officinalis L.	1	0.0151515
Tanacetum parthenium (L.)	1	0.0263158		Chelidonium majus L.	1	0.0151515		Brassica napus L.	1	0.0151515
Thymus vulgaris L.	1	0.0263158		Cicer arietinum L.	1	0.0151515		Brassica oleracea L.	1	0.0151515
Vitis vinifera L.	1	0.0263158		Cinnamomum verum J.Presl	1	0.0151515		Buxus sempervirens L.	1	0.0151515
Total	38	1		Cistus albidus L.	1	0.0151515		Cardopatium corymbosum (L.) Pers.	1	0.0151515
				Cistus laurifolius L.	1	0.0151515		Crithmum maritimum L.	1	0.0151515
				Hedera helix L. s. l.	1	0.0151515		Diplotaxis erucoides (L.) DC.	1	0.0151515
				Juniperus oxycedrus L.	1	0.0151515		Euphorbia glareosa Pall. Ex Bieb.	1	0.0151515
				Juniperus sabina L.	1	0.0151515		Ficus carica L.	1	0.0151515
				Linum usitatissimum L.	1	0.0151515		Foeniculum vulgare Mill.	1	0.0151515
				Malva neglecta Wallr.	1	0.0151515		Hedera helix L. s. l.	1	0.0151515
				Ononis spinosa L.	1	0.0151515		Hordeum vulgare L.	1	0.0151515
				Paeonia broteroi Boiss. & Reut.	1	0.0151515		Leontodon tuberosus L.	1	0.0151515
				Parietaria diffusa M. Et K.	1	0.0151515		Malva neglecta Wallr.	1	0.0151515
				Phlomis lychnitis L.	1	0.0151515		Paliurus spina-christi Mill.	1	0.0151515
				Phlomis purpurea L.	1	0.0151515		Phaseolus vulgaris L.	1	0.0151515
				Quercus rotundifolia Lam.	1	0.0151515		Ranunculus bulbosus L.	1	0.0151515
				Rosmarinus officinalis L.	1	0.0151515		Ruscus hypoglossum L.	1	0.0151515
				Rubus ulmifolius Schott	1	0.0151515		Sanguisorba minor L.	1	0.0151515
				Ruta angustifolia Pers.	1	0.0151515		Senecio jacobaea L.	1	0.0151515
				Ruta graveolens L.	1	0.0151515		Symphytum officinale L.	1	0.0151515
				Sideritis hirsuta L.	1	0.0151515		Triticum aestivum L.	1	0.0151515
				Stipa tenacissima L.	1	0.0151515		Umbilicus rupestris (Salisb.) Dandy	1	0.0151515
				Thymus serpyllum L.	1	0.0151515		Verbena officinalis L.	1	0.0151515
				Viscum album L.	1	0.0151515		Viscum album L.	1	0.0151515
				Total	66	1		Total	66	1

## Sheet: QJ
EEVRT = European Ethnoveterinary use Report closely linked to a classification according to the ATCvet code (Anatomical Therapeutic Chemical Classification System for veterinary medicinal products)
QJ (Antiinfectives for systemic use)
Plant species	EEVRT	Percentage
Vitis vinifera L.	5	0.0847458
Allium sativum L.	4	0.0677966
Fraxinus ornus L.	3	0.0508475
Helleborus foetidus L.	3	0.0508475
Helleborus orientalis Lam.	3	0.0508475
Allium cepa L.	2	0.0338983
Cistus incanus L.	2	0.0338983
Colutea arborescens L.	2	0.0338983
Daphne laureola L.	2	0.0338983
Marrubium incanum Desr.	2	0.0338983
Marrubium vulgare L.	2	0.0338983
Rosmarinus officinalis L.	2	0.0338983
Salix alba L.	2	0.0338983
Asplenium fontanum (L.)	1	0.0169491
Ceterach officinarum DC. In Lam. et DC.	1	0.0169491
Daphne gnidium L.	1	0.0169491
Erica arborea L.	1	0.0169491
Erigeron acer Bivona	1	0.0169491
Ferula communis L.	1	0.0169491
Fraxinus excelsior L.	1	0.0169491
Gentiana cruciata L.	1	0.0169491
Helleborus odorus W.K.	1	0.0169491
Malva sylvestris L.	1	0.0169491
Pistacia lentiscus L.	1	0.0169491
Polypodium vulgare L.	1	0.0169491
Quercus pubescens Willd.	1	0.0169491
Quercus sp.	1	0.0169491
Ruta chalepensis L.	1	0.0169491
Salix sp.	1	0.0169491
Scrophularia canina L.	1	0.0169491
Sempervivum tectorum L.	1	0.0169491
Stipa tenacissima L.	1	0.0169491
Symphytum officinale L.	1	0.0169491
Thapsia villosa L.	1	0.0169491
Thymus mastichina (L.) L.	1	0.0169491
Thymus vulgaris L.	1	0.0169491
Verbascum thapsus L.	1	0.0169491
Vicia faba L.	1	0.0169491
Total	59	1

## Sheet: QL
EEVRT = European Ethnoveterinary use Report closely linked to a classification according to the ATCvet code (Anatomical Therapeutic Chemical Classification System for veterinary medicinal products)
QL (Antineoplastic and immunomodulating agents)
Plant species	EEVRT	Percentage
Helleborus foetidus L.	1	1
Total	1	1

## Sheet: QM
EEVRT = European Ethnoveterinary use Report closely linked to a classification according to the ATCvet code (Anatomical Therapeutic Chemical Classification System for veterinary medicinal products)
QM (Musculo-skeletal system)
Plant species	EEVRT	Percentage
Malva sylvestris L.	7	0.0736842
Brassica oleracea L.	4	0.0421053
Helleborus orientalis Lam.	4	0.0421053
Inula viscosa (L.) Aiton	4	0.0421053
Retama sphaerocarpa (L.) Boiss.	4	0.0421053
Spartium junceum L.	4	0.0421053
Hypericum perforatum L.	3	0.031579
Juniperus communis L.	3	0.031579
Symphytum officinale L.	3	0.031579
Verbascum sinuatum L.	3	0.031579
Allium cepa L.	2	0.0210526
Allium sativum L.	2	0.0210526
Allium sp.pl.	2	0.0210526
Brassica nigra (L.) Koch	2	0.0210526
Cistus ladanifer L.	2	0.0210526
Daphne gnidium L.	2	0.0210526
Hyoscyamus niger L.	2	0.0210526
Juniperus oxycedrus L.	2	0.0210526
Linum usitatissimum L.	2	0.0210526
Teucrium chamaedrys L.	2	0.0210526
Vitis vinifera L.	2	0.0210526
Arctium lappa L.	1	0.0105263
Arnica montana L.	1	0.0105263
Cannabis sativa L.	1	0.0105263
Cupressus sempervirens L.	1	0.0105263
Cytisus multiflorus (L'Hér.) Sweet	1	0.0105263
Eryngium campestre L.	1	0.0105263
Ferula communis L.	1	0.0105263
Hyoscyamus albus L.	1	0.0105263
Ilex aquifolium L	1	0.0105263
Juglans regia L.	1	0.0105263
Juniperus sp.	1	0.0105263
Larix decidua Miller	1	0.0105263
Lilium martagon L.	1	0.0105263
Micromeria graeca (L.) Benth.	1	0.0105263
Olea europaea L.	1	0.0105263
Picea abies (L.) H. Karst.	1	0.0105263
Pinus sp.	1	0.0105263
Quercus pubescens Willd.	1	0.0105263
Quercus suber L.	1	0.0105263
Ranunculus acris L.	1	0.0105263
Ranunculus bulbosus L.	1	0.0105263
Ranunculus lanuginosus L.	1	0.0105263
Rhododendron ferrugineum L.	1	0.0105263
Rumex obtusifolius L.	1	0.0105263
Ruta graveolens L.	1	0.0105263
Sambucus nigra L.	1	0.0105263
Satureja montana L	1	0.0105263
Solanum tuberosum L.	1	0.0105263
Tamus communis L.	1	0.0105263
Thapsia villosa L.	1	0.0105263
Triticum aestivum L.	1	0.0105263
Urtica dioica L.	1	0.0105263
Verbascum mallophorum L.	1	0.0105263
Verbascum thapsus L.	1	0.0105263
Total	95	1

[truncated: 5 more sheets: QN, QP, QP subcodes, QR, QS]
